# Supplementary material
Source: PubMed Central journal article supplement (PMC3268397)
Supplement: supp_M111.280974_jbc.M111.280974-1.pdf [file supp_M111.280974_jbc.M111.280974-1.pdf]

## **SUPPLEMENTAL MATERIAL**

### **LEGENDS TO SUPPLEMENTARY FIGURES**

**Supplemental Fig. 1.** Preparation of E13.5 and E14.5 palatal mesenchyme. *A-D*. Quantitative RT-PCR analysis of palatal epithelium (Ep) and mesenchyme (Mes) separated from E13.5 and E14.5 *Tgfb<sup>2</sup><sup>fl/fl</sup>* control (open columns) and *Tgfb<sup>2</sup><sup>fl/fl</sup>;Wnt1-Cre* (closed columns) palates (see Materials and Methods). Keratin 14 (K14) served as an epithelial specific marker. \**p*<0.05.

**Supplemental Fig. 2.** Protein expression of FGF9 and PITX2 in the palate of *Tgfb<sup>2</sup><sup>fl/fl</sup>* control and *Tgfb<sup>2</sup><sup>fl/fl</sup>;Wnt1-Cre* mice. *A,B*. Immunohistochemical analysis of FGF9 (A) and PITX2 (B) in the palate of *Tgfb<sup>2</sup><sup>fl/fl</sup>* control and *Tgfb<sup>2</sup><sup>fl/fl</sup>;Wnt1-Cre* mice at E13.5 and E14.5. Arrows indicate expression. Inserts (upper right) show low magnification of the craniofacial region. Insert in *B* (bottom left) shows high magnification of the dotted area.

**Supplemental Fig. 3.** Preparation of E14.5 palatal mesenchyme from *Tgfb<sup>2</sup><sup>fl/fl</sup>* control (open columns) and *Tgfb<sup>2</sup><sup>fl/fl</sup>;Wnt1-Cre* (closed columns) mice. Quantitative RT-PCR analysis of Cytokeratin 14 (K14) in the separated epithelium (Ep) and mesenchyme (Mes) during the preparation of the palatal mesenchyme organ culture used in Fig. 2*B*. \**p*<0.05.

**Supplemental Fig. 4.** Schematic diagram of TGFβ-mediated FGF9 signaling. TGFβ signaling contributes to mesenchymal cell proliferation via a *Fgf9-Pitx2* signaling pathway during palatal formation.

### **LEGENDS TO SUPPLEMENTARY TABLES**

**Supplemental Table 1.** List of genes with cleft palate phenotype in mice.

**Supplemental Table 2.** Conserved SMAD recognition sequences in the *FGF9* gene.

<sup>a</sup>The binding site motif is underlined in all cases. It is placed on blue if the sequence is conserved in all eight species except dog and/or horse and in red if conserved in all eight species. These species include: human (Build 19), chimpanzee (Build 2.1.3), orangutan (Build 2.0.2), rhesus macaque (Build 1.0), mouse (Build 37), rat (Build 3.4), dog (Build 2) and horse (Build equCab2).

**Supplemental Table 3.** Conserved ATF2 recognition sequences in the *FGF9* gene.

<sup>a</sup>The binding site motif is underlined and placed in red to indicate that it is conserved in all eight species: (human (Build 19), chimpanzee (Build 2.1.3), orangutan (Build 2.0.2), rhesus macaque (Build 1.0), mouse (Build 37), rat (Build 3.4), dog (Build 2) and horse (Build equCab2).

**Supplemental Table 4.** Conserved SMAD recognition sequences in the *PITX2* gene.

<sup>a</sup>The binding site motif is underlined in all cases. It is placed on blue if the sequence is conserved in all eight species except dog and/or horse and in red if conserved in all eight species. These include: human (Build 19), chimpanzee (Build 2.1.3), orangutan (Build 2.0.2), rhesus macaque (Build 1.0), mouse (Build 37), rat (Build 3.4), dog (Build 2) and horse (Build equCab2).

**Supplemental Table 5.** Conserved ATF2 recognition sequences in the *PITX2* gene

<sup>a</sup>The binding site motif is underlined and placed in red to indicate that it is conserved in all eight species: (human (Build 19), chimpanzee (Build 2.1.3), orangutan (Build 2.0.2), rhesus macaque (Build 1.0), mouse (Build 37), rat (Build 3.4), dog (Build 2) and horse (Build equCab2).

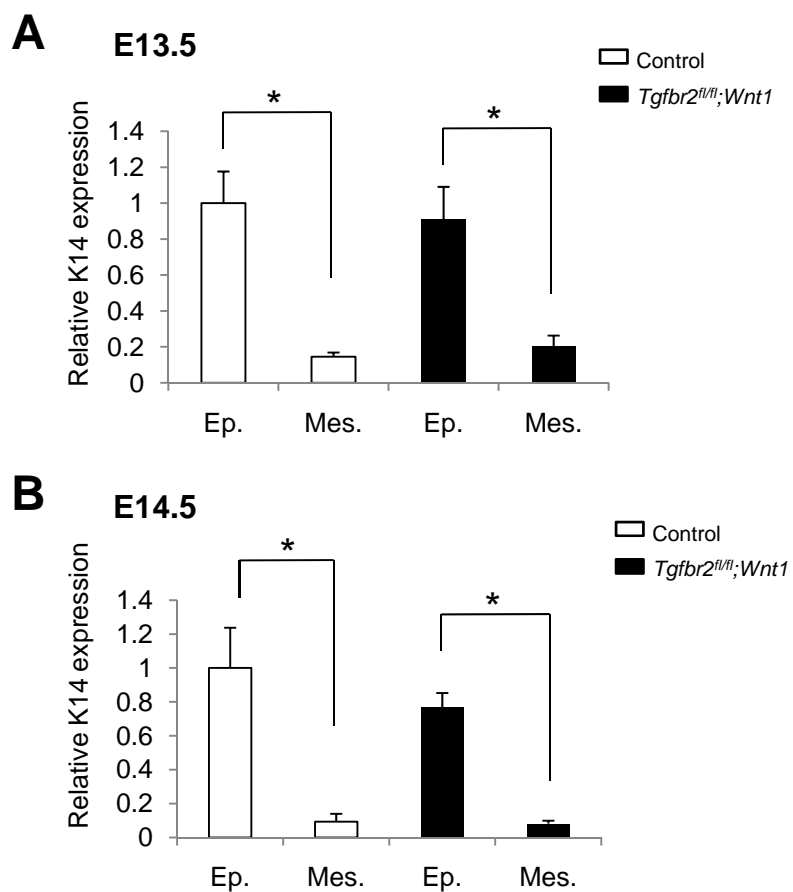

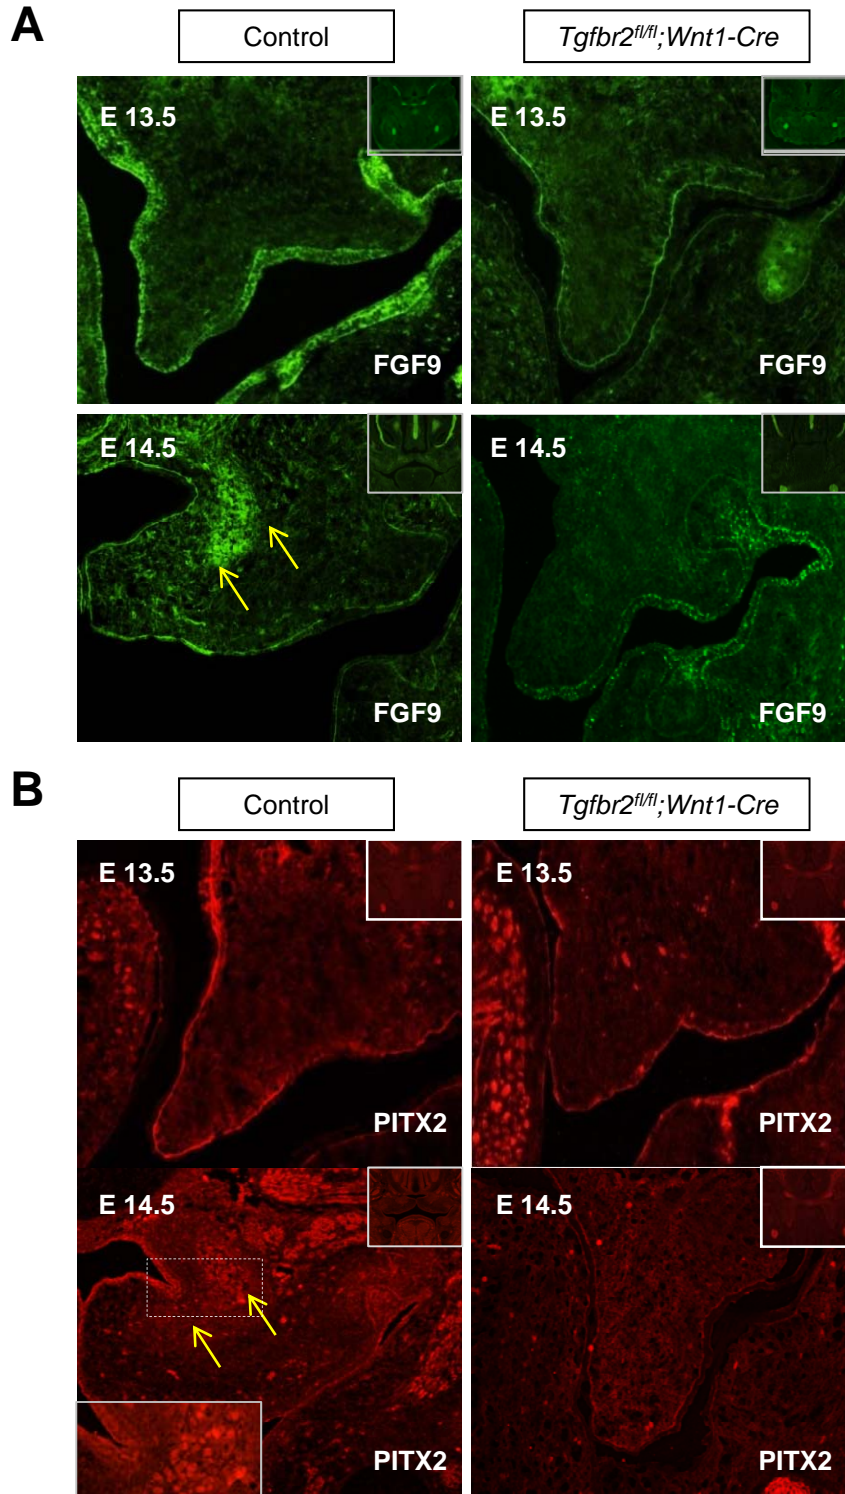

Supplemental Figure 3. Iwata *et al.*

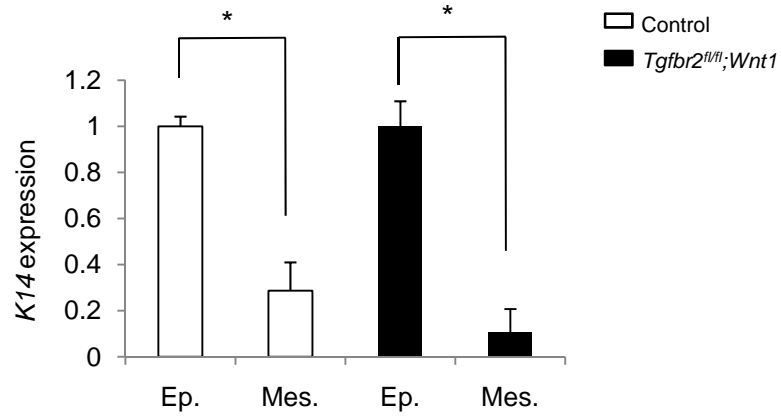

Supplemental Figure 4. Iwata *et al.*

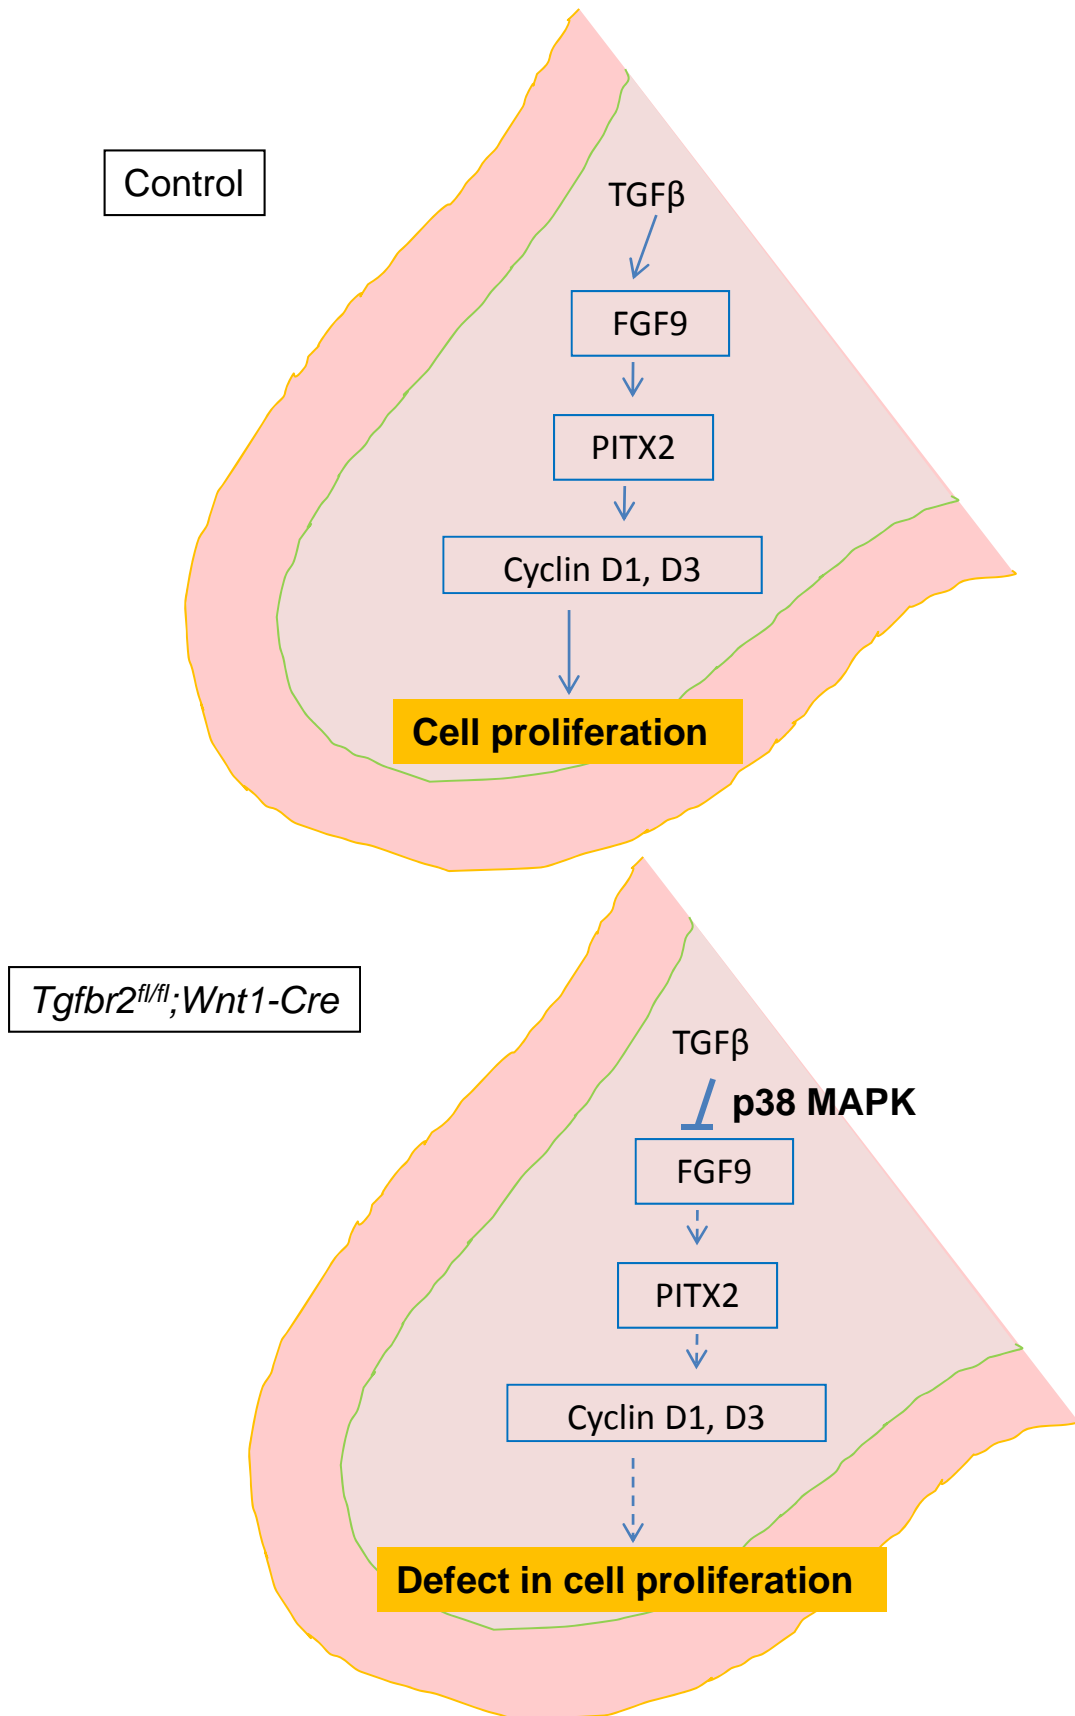

Supplemental Table 1.

| Allele Symbol | Gene                                                              | Chromosome | Category                                                                               |
|---------------|-------------------------------------------------------------------|------------|----------------------------------------------------------------------------------------|
| Abn           | abnormal                                                          | UN         | Spontaneous                                                                            |
| Acan          | aggrecan                                                          | 7          | Spontaneous                                                                            |
| Acvr1         | activin A receptor, type 1                                        | 2          | Targeted (knock-out)<br>Targeted (conditional)                                         |
| Acvr2a        | activin A receptor IIA                                            | 2          | Targeted (knock-out)                                                                   |
| Aecp          | vitamin A enhanced cleft palate                                   | 17         | QTL                                                                                    |
| Ahr           | aryl-hydrocarbon receptor                                         | 12         | Not applicable<br>Targeted (reporter)                                                  |
| Akap8         |                                                                   | 17         | Gene trapped                                                                           |
| Alx1          | ALX homeobox 1                                                    | 10         | Targeted (knock-out)                                                                   |
| Alx4          | aristaless-like homeobox 4                                        | 2          | Targeted (knock-out)                                                                   |
| Am            | amputated                                                         | 8          | Radiation induced                                                                      |
| Apaf1         | apoptotic peptidase activating factor 1                           | 10         | Gene trapped                                                                           |
| Arid5b        | AT rich interactive domain 5B (Mrf1 like)                         | 10         | Gene trapped                                                                           |
| Asph          | aspartate beta-hydroxylase                                        | 4          | Targeted (knock-out)                                                                   |
| Axin1         | axin 1                                                            | 17         | Targeted (knock-in)                                                                    |
| Ay            | nonagouti                                                         | 2          | Spontaneous                                                                            |
| AY074887      | cDNA sequence AY074887                                            | 9          | Targeted (knock-out)                                                                   |
| Barx1         | BarH-like homeobox 1                                              | 13         | Targeted (knock-out)                                                                   |
| Bmi1          | Bmi1 polycomb ring finger oncogene                                | 2          | Targeted (knock-out)                                                                   |
| Bmp7          | bone morphogenetic protein 7                                      | 2          | Targeted (conditional)<br>Targeted (knock-out)                                         |
| Br            | brachyrrhine                                                      | 17         | Targeted (knock-out)                                                                   |
| Cacna1s       | calcium channel, voltage-dependent, L type, alpha 1S subunit      | 1          | Spontaneous                                                                            |
| Cask          | calcium/calmodulin-dependent serine protein kinase (MAGUK family) | X          | Transgenic (random, gene disruption)<br>Targeted (knock-out)<br>Targeted (conditional) |
| Cdkn1a        | cyclin-dependent kinase inhibitor 1A (p21)                        | 17         | Targeted (knock-out)                                                                   |
| Cdkn1c        | cyclin-dependent kinase inhibitor 1C (p57)                        | 7          | Targeted (knock-out)                                                                   |
| Chd7          | chromodomain helicase DNA binding protein 7                       | 4          | Chemically induced (ENU)                                                               |
| Chrd          | chordin                                                           | 16         | Targeted (knock-out)                                                                   |
| Chuk          | conserved helix-loop-helix ubiquitous kinase                      | 19         | Targeted (knock-out)                                                                   |
| Clf1          | cleft lip 1                                                       | 11         | Spontaneous                                                                            |
| Clf2          | cleft lip 2                                                       | 13         | Spontaneous                                                                            |
| Clptm1        | cleft lip and palate associated transmembrane protein 1           | 7          | Targeted (knock-out)                                                                   |
| Col2a1        | collagen, type II, alpha 1                                        | 15         | Radiation induced<br>Targeted (knock-in)<br>Targeted (knock-out)                       |
| Col11a1       | collagen, type XI, alpha 1                                        | 3          | Spontaneous                                                                            |
| Col11a2       | collagen, type XI, alpha 2                                        | 17         | Targeted (knock-out)                                                                   |
| Col12a1       | collagen, type XII, alpha 1                                       | 9          | Targeted (knock-out)                                                                   |
| Cp2           | cleft palate 2                                                    | UN         | Targeted (knock-out)                                                                   |
| Crebbp        | CREB binding protein                                              | 16         | Targeted (knock-in)                                                                    |
| Crk           | v-crk sarcoma virus CT10 oncogene homolog (avian)                 | 11         | Targeted (knock-out)                                                                   |
| Crn           | cranioschisis                                                     | UN         | Spontaneous                                                                            |
| Csp1          | cleft secondary palate 1                                          | 4          | Chemically induced (ENU)                                                               |
| Csp2          | cleft secondary palate 2                                          | UN         | Chemically induced (ENU)                                                               |
| Ctgf          | connective tissue growth factor                                   | 10         | Targeted (knock-out)                                                                   |
| Ctnnbip1      | catenin beta interacting protein 1                                | 4          | Targeted (knock-out)                                                                   |
| Cycsp         | curly tail and cleft secondary palate                             | 3          | Chemically induced (ENU)                                                               |
| Dhcr7         | 7-dehydrocholesterol reductase                                    | 7          | Targeted (knock-out)                                                                   |
| Dkk1          | dickkopf homolog 1 (Xenopus laevis)                               | 19         | Targeted (knock-out)                                                                   |
| Dlg1          | discs, large homolog 1 (Drosophila)                               | 16         | Gene trapped<br>Targeted (knock-out)                                                   |
| Dlx1          | distal-less homeobox 1                                            | 2          | Targeted (knock-out)                                                                   |
| Dlx2          | distal-less homeobox 2                                            | 2          | Targeted (reporter)<br>Targeted (knock-out)                                            |
| Dlx1 & Dlx2   |                                                                   | 2<br>2     | Targeted (Dlx1; knock-out)<br>Targeted (Dlx2; knock-out)                               |
| Dlx5          | distal-less homeobox 5                                            | 6          | Targeted (reporter)<br>Targeted (knock-out)                                            |

**Supplemental Table 1. (Continued)**

| Allele Symbol | Gene                                                          | Chromosome | Category                                                                                              |
|---------------|---------------------------------------------------------------|------------|-------------------------------------------------------------------------------------------------------|
| Dph1          | DPH1 homolog ( <i>S. cerevisiae</i> )                         | 11         | Targeted (knock-out)                                                                                  |
| Dxcp1         | dexamethasone induced cleft palate 1                          | 17         | QTL                                                                                                   |
| Dxcp2         | dexamethasone induced cleft palate 2                          | 17         | QTL                                                                                                   |
| Dxcp3         | dexamethasone induced cleft palate 3                          | 17         | Targeted (knock-out)                                                                                  |
| Edn1          | endothelin 1                                                  | 13         | Targeted (knock-out)                                                                                  |
| Ednra         | endothelin receptor type A                                    | 8          | Targeted (knock-out)                                                                                  |
| Ednrb         | endothelin receptor type B                                    | 14         | Radiation induced                                                                                     |
| Efna5         | ephrin A5                                                     | 17         | Targeted (knock-out)                                                                                  |
| Efnb1         | ephrin B1                                                     | X          | Targeted (knock-out)<br>Targeted (conditional)                                                        |
| Egfr          | epidermal growth factor receptor                              | 11         | Targeted (knock-out)                                                                                  |
| Eya1          | eyes absent 1 homolog ( <i>Drosophila</i> )                   | 1          | Targeted (knock-out)                                                                                  |
| Eya4          | eyes absent 4 homolog ( <i>Drosophila</i> )                   | 10         | Targeted (knock-out)                                                                                  |
| Far           | first arch                                                    | 2          | Spontaneous                                                                                           |
| Fbxo11        | F-box protein 11                                              | 17         | Chemically induced (ENU)                                                                              |
| <b>Fgf9</b>   | <b>fibroblast growth factor 9</b>                             | <b>14</b>  | <b>Targeted (knock-out)</b>                                                                           |
| Fgf10         | fibroblast growth factor 10                                   | 13         | Targeted (knock-out)                                                                                  |
| Fgf18         | fibroblast growth factor 18                                   | 11         | Targeted (knock-out)                                                                                  |
| Fgfr1         | fibroblast growth factor receptor 1                           | 8          | Targeted (knock-out)<br>Targeted (conditional, Wnt1-Cre)                                              |
| Fgfr2         | fibroblast growth factor receptor 2                           | 7          | Targeted (knock-out)<br>Targeted (knock-in)<br>Targeted (reporter)<br>Targeted (conditional, K14-Cre) |
| Figf          | fidgetin                                                      | 2          | Spontaneous                                                                                           |
| Flna          | filamin, alpha                                                | X          | Chemically induced (ENU)                                                                              |
| Foxc2         | forkhead box C2                                               | 8          | Targeted (knock-out)                                                                                  |
| Foxd3         | forkhead box D3                                               | 4          | Targeted (conditional)                                                                                |
| Foxe1         | forkhead box E1 (thyroid transcription factor 2)              | 4          | Targeted (knock-out)                                                                                  |
| Foxf2         | forkhead box F2                                               | 13         | Targeted (knock-out)                                                                                  |
| Fst           | follistatin                                                   | 13         | Targeted (knock-out)                                                                                  |
| Gab1          | growth factor receptor bound protein 2-associated protein 1   | 8          | Targeted (reporter)<br>Targeted (knock-in)                                                            |
| Gabbr3        | gamma-aminobutyric acid (GABA-A) receptor, subunit beta 3     | 7          | Targeted (knock-out)<br>Targeted (conditional)                                                        |
| Gad1          | glutamic acid decarboxylase 1                                 | 2          | Targeted (knock-out)<br>Targeted (reporter)                                                           |
| Gad2          | glutamic acid decarboxylase 2                                 | 2          | Targeted (knock-out)                                                                                  |
| Gbx2          | gastrulation brain homeobox 2                                 | 1          | Targeted (knock-out)                                                                                  |
| Glce          | glucuronyl C5-epimerase                                       | 9          | Targeted (knock-out)                                                                                  |
| Gli2          | GLI-Kruppel family member GLI2                                | 1          | Targeted (knock-out)                                                                                  |
| Gli3          | GLI-Kruppel family member GLI3                                | 13         | Spontaneous<br>Targeted (other)                                                                       |
| Grb2          | growth factor receptor bound protein 2                        | 11         | Targeted (knock-in)                                                                                   |
| Gsk3b         | glycogen synthase kinase 3 beta                               | 16         | Targeted (knock-out)                                                                                  |
| H19 & Igf2r   | H19 fetal liver mRNA<br>Insulin-like growth factor 2 receptor | 7<br>17    | Targeted (H19; knock-out)<br>Targeted (Igf2r; knock-out)                                              |
| Hand2         | heart and neural crest derivatives expressed transcript 2     | 8          | Targeted (conditional)<br>Targeted (knock-out)                                                        |
| Hic1          | hypermethylated in cancer 1                                   | 11         | Targeted (knock-out)                                                                                  |
| Hoxa1         | homeo box A1                                                  | 6          | Targeted (knock-out)                                                                                  |
| Hoxa2         | homeo box A2                                                  | 6          | Targeted (knock-in)<br>Targeted (knock-out)                                                           |
| Hpmd          | hypoplastic mandible                                          | UN         | Chemically induced (ENU)                                                                              |
| Hs2st1        | heparan sulfate 2-O-sulfotransferase 1                        | 3          | Gene trapped                                                                                          |
| Hspg2         | perlecan (heparan sulfate proteoglycan 2)                     | 4          | Targeted (knock-out)                                                                                  |
| Ift88         | intraflagellar transport 88 homolog ( <i>Chlamydomonas</i> )  | 14         | Transgenic (random, gene disruption)                                                                  |
| Igf2          | insulin-like growth factor 2                                  | 7          | Transgenic (random, gene disruption)                                                                  |

**Supplemental Table 1. (Continued)**

| Allele Symbol   | Gene                                                         | Chromosome | Category                                                              |
|-----------------|--------------------------------------------------------------|------------|-----------------------------------------------------------------------|
| Ilk             | integrin linked kinase                                       | 7          | Targeted (conditional)                                                |
| Impad1          | inositol monophosphatase domain containing 1                 | 4          | Targeted (knock-out)                                                  |
| Inhba           | inhibin beta-A                                               | 13         | Targeted (knock-out)                                                  |
| Inhbb           | inhibin beta-B                                               | 1          | Targeted (knock-out)                                                  |
| Inpp5e          | inositol polyphosphate-5-phosphatase E                       | 2          | Targeted (knock-out)                                                  |
| Insig1 & Insig2 | insulin induced gene, 1 and 2                                | 5          | Targeted (Insig1; knock-out)                                          |
|                 |                                                              | 1          | Targeted (Insig2; knock-out)                                          |
| Irf6            | interferon regulatory factor 6                               | 1          | Gene trapped<br>Targeted (knock-in)                                   |
| Itgav           | integrin alpha V                                             | 2          | Targeted (knock-out)                                                  |
| Itgb1           | integrin beta 1 (fibronectin receptor beta)                  | 8          | Targeted (conditional)<br>Targeted (knock-out)                        |
| Itgb8           | integrin beta 8                                              | 12         | Targeted (knock-out)                                                  |
| Jag2            | jagged 2                                                     | 12         | Targeted (knock-out)                                                  |
| Jmjd6           | jumonji domain containing 6                                  | 11         | Targeted (knock-out)                                                  |
| Kcnj2           | potassium inwardly-rectifying channel, subfamily J, member 2 | 11         | Targeted (knock-out)                                                  |
| Krt5            | keratin 5                                                    | 15         | Targeted (knock-out)                                                  |
| Lbr & Dhcr14    | lamin B receptor                                             | 1          | Targeted (Lbr; knock-out)<br>Targeted (Dhcr14; knock-out)             |
| Lgl             | legless                                                      | 12         | Transgenic (random, gene disruption)                                  |
| Lhx8            | LIM homeobox protein 8                                       | 3          | Targeted (knock-out)<br>Targeted (reporter)                           |
| Lrp6            | low density lipoprotein receptor-related protein 6           | 6          | Targeted (knock-out)                                                  |
| Lse             | low set ears                                                 | UN         | Spontaneous                                                           |
| Luzp1           | leucine zipper protein 1                                     | 4          | Targeted (knock-out)                                                  |
| Mdm2 & Mdm4     | transformed mouse 3T3 cell double minute, 2 and 4            | 10         | Targeted (Mdm2; knock-out)                                            |
|                 |                                                              | 1          | Targeted (Mdm4; knock-out)                                            |
| Meox2           | mesenchyme homeobox 2                                        | 12         | Targeted (knock-out)                                                  |
| Met             | met proto-oncogene                                           | 6          | Targeted (knock-out)                                                  |
| Mmp14           | matrix metalloproteinase 14 (membrane-inserted)              | 14         | Targeted (knock-out)                                                  |
| Mmp16           | matrix metalloproteinase 16                                  | 4          | Targeted (knock-out)                                                  |
| Mn1             | meningioma 1                                                 | 5          | Targeted (knock-out)                                                  |
| Mnt             | max binding protein                                          | 11         | Targeted (knock-out)                                                  |
| Msc             | musculin                                                     | 1          | Targeted (knock-out)                                                  |
| Msx1            | homeobox, msh-like 1                                         | 5          | Targeted (reporter)<br>Targeted (conditional)<br>Targeted (knock-out) |
| Msx2            | homeobox, msh-like 2                                         | 13         | Targeted (knock-out)                                                  |
| Myst3           | MYST histone acetyltransferase (monocytic leukemia) 3        | 8          | Targeted (knock-out)                                                  |
| Ncor2           | nuclear receptor co-receptor 2                               | 5          | Targeted (knock-out)                                                  |
| Ndst1           | N-deacetylase/N-sulfotransferase (heparan glucosaminyl) 1    | 18         | Targeted (knock-out)                                                  |
| Oca2            | oculocutaneous albinism II                                   | 7          | Radiation induced                                                     |
| Oel             | open eyelids with cleft palate                               | UN         | Spontaneous                                                           |
| Ofd1            | oral-facial-digital syndrome 1 gene homolog (human)          | X          | Targeted (conditional)                                                |
| Osr2            | odd-skipped related 2 (Drosophila)                           | 15         | Targeted (reporter)                                                   |
| Pad             | paddle                                                       | UN         | Spontaneous                                                           |
| Papss2          | 3'-phosphoadenosine 5'-phosphosulfate synthase 2             | 19         | Spontaneous                                                           |
| Pax3            | paired box gene 3                                            | 1          | Targeted (conditional)                                                |
| Pax9            | paired box gene 9                                            | 12         | Targeted (conditional)<br>Targeted (reporter)                         |
| Pc              | phocomelic                                                   | UN         | Spontaneous                                                           |
| Pcgf2           | polycomb group ring finger 2                                 | 11         | Targeted (knock-out)                                                  |
| Pcp             | polydactyly with cleft palate                                | UN         | Spontaneous                                                           |
| Pdgfc           | platelet-derived growth factor, C polypeptide                | 3          | Targeted (knock-out)<br>Targeted (reporter)                           |
| Pdgfra          | platelet-derived growth factor receptor, alpha polypeptide   | 5          | Targeted (knock-in)<br>Targeted (knock-out)<br>Targeted (conditional) |
| Pdgfrb          | platelet-derived growth factor receptor, beta polypeptide    | 18         | Targeted (conditional)                                                |



**Supplemental Table 1. (Continued)**

| Allele Symbol | Gene                                                                                         | Chromosome | Category                                                              |
|---------------|----------------------------------------------------------------------------------------------|------------|-----------------------------------------------------------------------|
| Pds5a         | PDS5, regulator of cohesion maintenance, homolog A ( <i>S. cerevisiae</i> )                  | 5          | Targeted (knock-out)                                                  |
| Pds5b         | PDS5, regulator of cohesion maintenance, homolog B ( <i>S. cerevisiae</i> )                  | 5          | Targeted (knock-out)                                                  |
| Phc1          | polyhomeotic-like 1 ( <i>Drosophila</i> )                                                    | 6          | Targeted (knock-out)                                                  |
| Phc2          | polyhomeotic-like 2 ( <i>Drosophila</i> )                                                    | 4          | Targeted (knock-out)                                                  |
| Pitx1         | paired-like homeodomain transcription factor 1                                               | 13         | Targeted (knock-out)                                                  |
| <b>Pitx2</b>  | <b>paired-like homeodomain transcription factor 2</b>                                        | <b>3</b>   | <b>Targeted (knock-out)</b><br>Targeted (reporter)                    |
| Pkdcc         | protein kinase domain containing, cytoplasmic                                                | 17         | Targeted (knock-out)                                                  |
| Plekha1       | pleckstrin homology domain containing, family A (phosphoinositide binding specific) member 1 | 7          | Gene trapped                                                          |
| Prdm16        | PR domain containing 16                                                                      | 4          | Targeted (knock-out)                                                  |
| Prrx1         | paired related homeobox 1                                                                    | 1          | Targeted (reporter)<br>Targeted (knock-out)                           |
| Prrx2         | paired related homeobox 2                                                                    | 2          | Targeted (reporter)<br>Targeted (knock-out)                           |
| Ptd           | palate-tail-digits abnormality                                                               | X          | Not applicable                                                        |
| Ptprf & Ptprs | protein tyrosine phosphatase, receptor type, F and S                                         | 4<br>17    | Targeted (Ptprf; knock-in)<br>Targeted (Ptprs; knock-out)             |
| Pvrl1         | poliovirus receptor-related 1                                                                | 9          | Targeted (knock-out)                                                  |
| Pygo2         | pygopus 2                                                                                    | 3          | Targeted (knock-out)                                                  |
| Rad23b        | RAD23b homolog ( <i>S. cerevisiae</i> )                                                      | 4          | Targeted (knock-out)                                                  |
| Rax           | retina and anterior neural fold homeobox                                                     | 18         | Targeted (knock-out)                                                  |
| Recql4        | RecQ protein-like 4                                                                          | 15         | Targeted (knock-out)                                                  |
| Rfng          | RFNG O-fucosylpeptide 3-beta-N-acetylglucosaminyltransferase                                 | 11         | Targeted (knock-out)                                                  |
| Ror2          | receptor tyrosine kinase-like orphan receptor 2                                              | 13         | Targeted (reporter)<br>Targeted (knock-out)                           |
| Rspo2         | R-spondin 2 homolog ( <i>Xenopus laevis</i> )                                                | 15         | Transgenic (random, gene disruption)<br>Targeted (reporter)           |
| Runx2         | runt related transcription factor 2                                                          | 17         | Targeted (reporter)                                                   |
| Ryk           | receptor-like tyrosine kinase                                                                | 9          | Targeted (reporter)                                                   |
| Satb2         | special AT-rich sequence binding protein 2                                                   | 1          | Targeted (knock-in)<br>Targeted (knock-out)                           |
| Sc5d          | sterol-C5-desaturase (fungal ERG3, delta-5-desaturase) homolog ( <i>S. cerevisiae</i> )      | 9          | Targeted (knock-out)                                                  |
| Sfn           | stratifin                                                                                    | 4          | Radiation induced                                                     |
| Shh           | sonic hedgehog                                                                               | 5          | Targeted (knock-out)<br>Targeted (conditional, K14-Cre)               |
| Sho           | shorthead                                                                                    | UN         | Spontaneous                                                           |
| Shox2         | short stature homeobox 2                                                                     | 3          | Targeted (knock-out)                                                  |
| Sim2          | single-minded homolog 2 ( <i>Drosophila</i> )                                                | 16         | Targeted (knock-out)                                                  |
| Six1          | sine oculis-related homeobox 1 homolog ( <i>Drosophila</i> )                                 | 12         | Targeted (reporter)                                                   |
| Six3          | sine oculis-related homeobox 3 homolog ( <i>Drosophila</i> )                                 | 17         | Targeted (knock-out)                                                  |
| Six4          | sine oculis-related homeobox 4 homolog ( <i>Drosophila</i> )                                 | 12         | Targeted (reporter)                                                   |
| Slc32a1       | solute carrier family 32 (GABA vesicular transporter)                                        | 2          | Targeted (knock-out)                                                  |
| Sme           | small ear                                                                                    | UN         | Radiation induced                                                     |
| Snai1         | snail homolog 1 ( <i>Drosophila</i> )                                                        | 2          | Targeted (knock-out)<br>Targeted (conditional)                        |
| Snai2         | snail homolog 2 ( <i>Drosophila</i> )                                                        | 16         | Targeted (knock-out)                                                  |
| Sos1          | Son of sevenless homolog 1 ( <i>Drosophila</i> )                                             | 17         | Targeted (reporter)                                                   |
| Sox4          | SRY (sex determining region Y)-box containing gene 4                                         | 13         | Targeted (knock-in)                                                   |
| Sox5          | SRY (sex determining region Y)-box containing gene 5                                         | 6          | Targeted (reporter)                                                   |
| Sox9          | SRY (sex determining region Y)-box containing gene 9                                         | 11         | Targeted (knock-out)<br>Targeted (reporter)<br>Targeted (conditional) |
| Sox11         | SRY-box containing gene 11                                                                   | 12         | Targeted (reporter)                                                   |
| Spry2         | sprouty homolog 2 ( <i>Drosophila</i> )                                                      | 14         | Targeted (knock-out)                                                  |
| Srn           | siren                                                                                        | UN         | Spontaneous                                                           |
| Srt           | shorty                                                                                       | 17         | Chemically induced (ENU)                                              |
| Sumo1         | SMT3 suppressor of mif two 3 homolog 1 (yeast)                                               | 1          | Gene trapped                                                          |

**Supplemental Table 1. (Continued)**

| Allele Symbol       | Gene                                               | Chromosome | Category                                                              |
|---------------------|----------------------------------------------------|------------|-----------------------------------------------------------------------|
| Tbx1                | T-box 1                                            | 16         | Targeted (conditional)<br>Targeted (knock-out)<br>Targeted (reporter) |
| Tbx10               | T-box 10                                           | 19         | Spontaneous                                                           |
| Tbx22               | T-box 22                                           | X          | Targeted (knock-out)                                                  |
| Tcf21               | transcription factor 21                            | 10         | Targeted (reporter)                                                   |
| Tcfap2a             | transcription factor AP-2, alpha                   | 13         | Targeted (reporter)<br>Targeted (conditional)                         |
| Tcof1               | Treacher Collins Franceschetti syndrome 1, homolog | 18         | Targeted (knock-out)                                                  |
| Tg(CAG-cre)1Nagy    | transgene insertion 1, Andras Nagy                 | UN         | Transgenic (Cre/Flp)                                                  |
| Tg (CMV-cre)1Cgn    | transgene insertion 1, University of Cologne       | UN         | Transgenic (Cre/Flp)                                                  |
| Tg(COL2A1)1Prc      | transgene insertion 1, Darwin J Prockop            | UN         | Transgenic (random, gene disruption)                                  |
| Tg(Col2a1-cre)1Asz  | transgene insertion 1, Attila Aszodi               | UN         | Transgenic (Cre/Flp)                                                  |
| Tg(KRT14-cre)1Amc   | transgene insertion 1, Andrew P McMahon            | UN         | Transgenic (Cre/Flp)                                                  |
| Tg(Msx2-cre)5Rem    | transgene insertion 5, Robert E Maxson             | UN         | Transgenic (Cre/Flp)                                                  |
| Tg(Myh6-Hoxb7)18Ssp | transgene insertion 18, S Steven Potter            | UN         | Transgenic (random, gene disruption)                                  |
| Tg(Myh6-Ncor2)1Kjep | transgene insertion 1, Kristen Jepsen              | UN         | Transgenic (random, gene disruption)                                  |
| Tg(Pgk1-cre)1Lni    | transgene insertion 1, Peter Lonai                 | UN         | Transgenic (Cre/Flp)                                                  |
| Tg(Prm-cre)58Og     | transgene insertion 58, Stephen O'Gorman           | UN         | Transgenic (Cre/Flp)                                                  |
| Tg(Spry2)2Tpo       | transgene insertion 2, Timothy P O'Brien           | UN         | Transgenic (random, gene disruption)                                  |
| Tg(Spry2)69Tpo      | transgene insertion 69, Timothy P O'Brien          | UN         | Transgenic (random, gene disruption)                                  |
| Tg(Wnt1-cre)11Rth   | transgene insertion 11, David H Rowitch            | UN         | Transgenic (Cre/Flp)                                                  |
| Tgfb2               | transforming growth factor, beta 2                 | 1          | Targeted (knock-out)                                                  |
| Tgfb3               | transforming growth factor, beta 3                 | 12         | Targeted (knock-in)<br>Targeted (knock-out)                           |
| Tgfr1               | transforming growth factor, beta receptor I        | 4          | Targeted (Floxed/Frt, K14-Cre)<br>Targeted (Floxed/Frt, Wnt1-Cre)     |
| Tgfr2               | transforming growth factor, beta receptor II       | 9          | Targeted (Floxed/Frt, K14-Cre)<br>Targeted (Floxed/Frt, Wnt1-Cre)     |
| Trp63               | transformation related protein 63                  | 16         | Targeted (knock-out)                                                  |
| Tshz1               | teashirt zinc finger family member 1               | 18         | Targeted (knock-out)                                                  |
| Tw                  | twirler                                            | 18         | Spontaneous                                                           |
| Twist1              | twist gene homolog 1 (Drosophila)                  | 12         | Chemically induced (ENU)                                              |
| Ur                  | urogenital                                         | UN         | Spontaneous                                                           |
| Vax1                | ventral anterior homeobox containing gene 1        | 19         | Targeted (knock-out)<br>Targeted (reporter)                           |
| Vax2                | ventral anterior homeobox containing gene 2        | 6          | Targeted (knock-out)                                                  |
| Vegfa               | vascular endothelial growth factor A               | 17         | Targeted (knock-out)                                                  |
| Whsc1               | Wolf-Hirschhorn syndrome candidate 1 (human)       | 5          | Targeted (knock-out)                                                  |
| Wnt9b               | wingless-type MMTV integration site 9B             | 11         | Targeted (knock-out)                                                  |
| Zeb1                | zinc finger E-box binding homeobox 1               | 18         | Targeted (reporter)                                                   |

**Supplemental Table 2. Conserved SMAD recognition sequences in the *FGF9* gene**

| Position relative to human transcription start site | Genomic context | Binding site sequence context <sup>a</sup> | Conservation of 4-bp site |
|-----------------------------------------------------|-----------------|--------------------------------------------|---------------------------|
| -2014                                               | Upstream        | CCT <u>GTCT</u> CTC                        | All but horse, dog        |
| -1723                                               | Upstream        | GCA <u>AGAC</u> GCA                        | All but dog               |
| -1513                                               | Upstream        | TTC <u>GTCT</u> TCA                        | All but horse, dog        |
| -1376                                               | Upstream        | TC <u>AGTCT</u> CTG                        | All but dog               |
| -1317                                               | Upstream        | CAA <u>GTCT</u> CGG                        | All 8 species             |
| -1270                                               | Upstream        | CTA <u>AGAC</u> AAT                        | All 8 species             |
| -231                                                | Upstream        | TGA <u>GTCT</u> CGG                        | All but horse, dog        |
| 332                                                 | Exon 1          | GAT <u>GTCT</u> GCA                        | All 8 species             |
| 527                                                 | Exon 1          | TGA <u>AGAC</u> CCTT                       | All 8 species             |
| 625                                                 | Exon 1          | CTT <u>AGAC</u> TAT                        | All 8 species             |
| 1615                                                | Intron 1        | AGG <u>GTCT</u> GAA                        | All 8 species             |
| 1946                                                | Intron 1        | TGC <u>AGAC</u> TCG                        | All but dog               |
| 2112                                                | Intron 1        | ACT <u>AGAC</u> TGT                        | All 8 species             |
| 3020                                                | Intron 1        | TGG <u>GTCT</u> GGC                        | All but horse, dog        |
| 4247                                                | Intron 1        | GCG <u>GTCT</u> CCC                        | All 8 species             |

<sup>a</sup>The binding site motif is underlined in all cases. It is placed on blue if the sequence is conserved in all eight species except dog and/or horse and in red if conserved in all eight species. These species include: human (Build 19), chimpanzee (Build 2.1.3), orangutan (Build 2.0.2), rhesus macaque (Build 1.0), mouse (Build 37), rat (Build 3.4), dog (Build 2) and horse (Build equCab2).

**Supplemental Table 3. Conserved ATF2 recognition sequences in the *FGF9* gene**

| Position relative to human transcription start site | Genomic context | Binding site sequence context <sup>a</sup> | Conservation of 8-bp site |
|-----------------------------------------------------|-----------------|--------------------------------------------|---------------------------|
| 397                                                 | Exon 1          | TTCT <u>TGACGTAG</u> CCC                   | All 8 species             |

<sup>a</sup>The binding site motif is underlined and placed in red to indicate that it is conserved in all eight species: (human (Build 19), chimpanzee (Build 2.1.3), orangutan (Build 2.0.2), rhesus macaque (Build 1.0), mouse (Build 37), rat (Build 3.4), dog (Build 2) and horse (Build equCab2)).

**Supplemental Table 4. Conserved SMAD recognition sequences in the *PITX2* gene**

| Position relative to human transcription start site | Genomic context | Binding site sequence context <sup>a</sup> | Conservation of 4-bp site |
|-----------------------------------------------------|-----------------|--------------------------------------------|---------------------------|
| 717                                                 | Intron 1        | GGA <u>GTCT</u> TCC                        | All but horse             |
| 4132                                                | Exon 2          | TCT <u>AGACT</u> CT                        | All 8 species             |
| 4658                                                | Exon 2          | TCT <u>GTCT</u> CCC                        | All but horse, dog        |
| 5113                                                | Exon 2          | GCG <u>AGAC</u> CGA                        | All 8 species             |
| 5317                                                | Exon 2          | CGG <u>AGAC</u> AGC                        | All 8 species             |
| 5387                                                | Intron 2        | CGA <u>GTCT</u> GGA                        | All but horse, dog        |
| 5519                                                | Intron 2        | CAC <u>AGAC</u> ACT                        | All but dog               |

<sup>a</sup>The binding site motif is underlined in all cases. It is placed on blue if the sequence is conserved in all eight species except dog and/or horse and in red if conserved in all eight species. These include: human (Build 19), chimpanzee (Build 2.1.3), orangutan (Build 2.0.2), rhesus macaque (Build 1.0), mouse (Build 37), rat (Build 3.4), dog (Build 2) and horse (Build equCab2).

**Supplemental Table 5. Conserved ATF2 recognition sequences in the *PITX2* gene**

| Position relative to human transcription start site | Genomic context | Binding site sequence context <sup>a</sup> | Conservation of 4-bp site |
|-----------------------------------------------------|-----------------|--------------------------------------------|---------------------------|
| 5032                                                | Exon 2          | TGCT <u>AGACGTCA</u> CGT                   | All 8 species             |

<sup>a</sup>The binding site motif is underlined and placed in red to indicate that it is conserved in all eight species: (human (Build 19), chimpanzee (Build 2.1.3), orangutan (Build 2.0.2), rhesus macaque (Build 1.0), mouse (Build 37), rat (Build 3.4), dog (Build 2) and horse (Build equCab2)).
